# Supplementary material
Source: PubMed Central journal article supplement (PMC4364227)
Supplement: pnas.201501698SI.pdf [file pnas.201501698SI.pdf]

# Supporting Information

Wright et al. 10.1073/pnas.1501698112

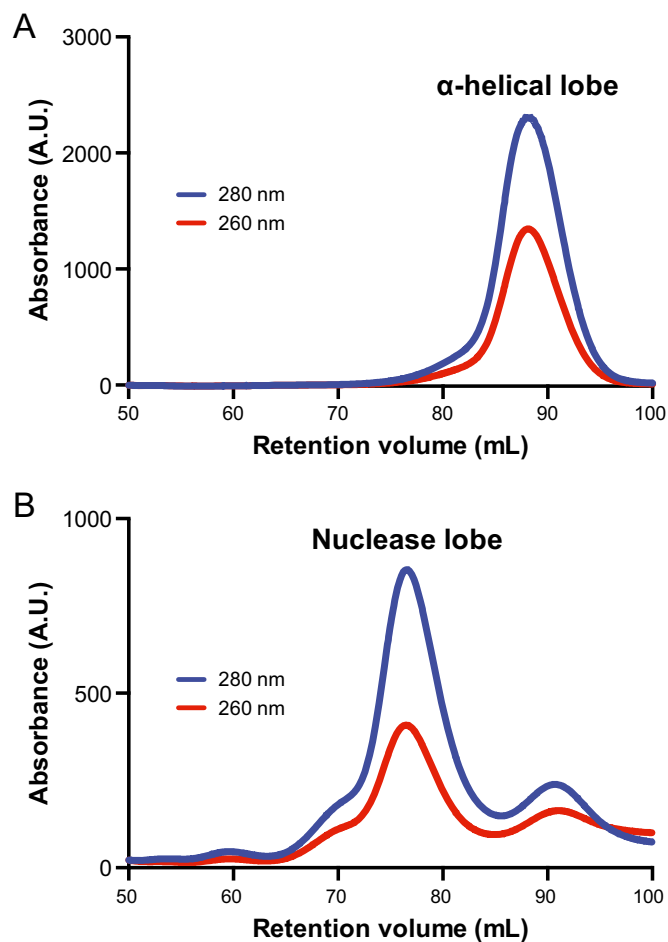

**Fig. S1.** Size-exclusion chromatograms of purified  $\alpha$ -helical (A) and nuclease (B) lobes. After cleavage of the affinity tag by TEV protease and further clean-up using ortho-Ni-NTA and ion-exchange columns ( $\alpha$ -helical lobe) or an ortho-Ni-NTA column alone (nuclease lobe), the polypeptides were concentrated and injected onto a HiLoad 16/60 Superdex 200 gel filtration column. The  $\alpha$ -helical (77 kDa) and nuclease lobes (81 kDa) eluted at 88.4 mL and 76.8 mL, respectively. Both polypeptides were soluble and exhibited consistent activity across multiple rounds of freeze-thawing.





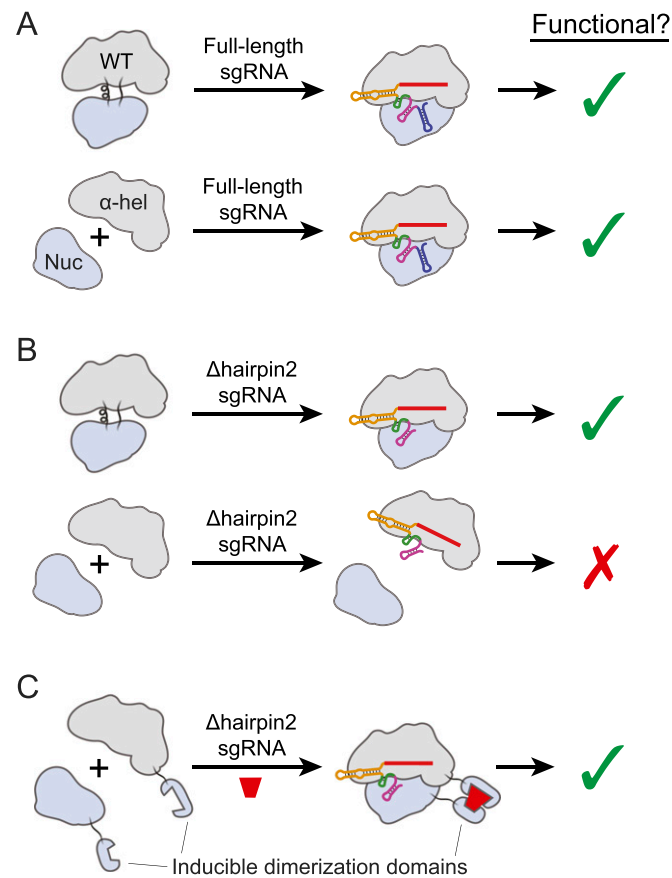

**Fig. 56.** Strategy for inducible control of genome engineering by a split-Cas9 enzyme complex. (A) Because the  $\alpha$ -helical and nuclease lobes dimerize in the presence of sgRNA, both WT and split-Cas9 are functional genome editing tools in cells using full-length sgRNA. (B) sgRNA variants with 3'-hairpin truncations have substantially weaker affinity for the nuclease lobe and thus do not efficiently assemble a functional split-Cas9 complex, leading to an inactive enzyme. In contrast, *in vitro* DNA cleavage by WT Cas9 is minimally affected by these truncations, indicating that the intrinsic activity of the Cas9-sgRNA enzyme complex does not require hairpins at the 3' end. (C) We propose an inducible split-Cas9 system, in which exogenous dimerization domains control the assembly of a functional ternary complex between a 3'-truncated sgRNA and the  $\alpha$ -helical and nuclease lobes. By fusing both lobes to domains that dimerize only upon some external stimulus (e.g., a small molecule; red trapezoid), split-Cas9 can be specifically activated for a desired genome-engineering outcome.



**Table S2. DNA and RNA substrates used in this study**

| Description                    | Sequence*                                                                                                                                        | Used in Figs.                                 |
|--------------------------------|--------------------------------------------------------------------------------------------------------------------------------------------------|-----------------------------------------------|
| λ1 target dsDNA                | 5′-AGCAGAAATCTCTGCTGACGCATAAAGATGAGACGCTGGAGTACAAACGTCAGCT-3′<br>3′-TCGTCTTTAGAGACGACTGCGTATTTCTACTCTGCGACCTCATGTTTGCAGTCGA-5′                   | 1D, 3C, S2A,<br>S2B, S3, S5, S7               |
| λ1 target dsDNA, mutated PAM   | 5′-AGCAGAAATCTCTGCTGACGCATAAAGATGAGACGCTCGAGTACAAACGTCAGCT-3′<br>3′-TCGTCTTTAGAGACGACTGCGTATTTCTACTCTGCGAGCTCATGTTTGCAGTCGA-5′                   | S2C                                           |
| λ2 target dsDNA, (λ1 mismatch) | 5′-GAGTGGAAAGGATGCCAGTGATAAGTGGAAATGCCATGTGGGCTGTCAAATTTGAGC-3′<br>3′-CTCACCTTCCTACGGTCACTATTCACCTTACGGTACACCCGACAGTTTAACTCG-5′                  | S2C                                           |
| λ1 sgRNA, full-length          | 5′-GACGCAUAAAGAUGAGACGCGUUUUAGAGCUAUGCUGUUUUGGAAACAAAACAGCAU-<br>AGCAAGUUAAAAUAAGGCUAGUCCGUUAUCAACUUGAAAAAGUGGCACCGAGUCGGUG-<br>CUUUUUUUGGAUC-3′ | 1D, 2C, 2E, 3C, S2A,<br>S2C, S3, S4D, S5, S7A |
| λ1 crRNA                       | 5′-GACGCAUAAAGAUGAGACGCGUUUUAGAGCUAUGCUGUUUUG-3′                                                                                                 | 2E, S2B                                       |
| TracrRNA                       | 5′-GGACAGCAUAGCAAGUUAAAAUAAGGCUAGUCCGUUAUCAACUUGAAAAAGUGGCAC-<br>CGAGUCGGUGCUUUUU-3′                                                             | 2E, S2B                                       |
| λ1 sgRNA, Δhairpin1 and -2     | 5′-GACGCAUAAAGAUGAGACGCGUUUUAGAGCUAUGCUGUUUUGGAAACAAAACAGCAU-<br>AGCAAGUUAAAAUAAGGCUAGUCCGUGGAUC-3′                                              | 2D, 3C, S7A                                   |
| λ1 sgRNA, Δhairpin2            | 5′-GACGCAUAAAGAUGAGACGCGUUUUAGAGCUAUGCUGUUUUGGAAACAAAACAGCAU-<br>AGCAAGUUAAAAUAAGGCUAGUCCGUUAUCAACUUGAAAAAGUGGAUC-3′                             | S7B                                           |
| λ1 sgRNA, Δhairpin1            | 5′-GACGCAUAAAGAUGAGACGCGUUUUAGAGCUAUGCUGUUUUGGAAACAAAACAGCAU-<br>AGCAAGUUAAAAUAAGGCUAGUCCGUUGGCACCGAGUCGGUGCUUUUUUU-3′                           | S7B                                           |
| λ1 sgRNA, Δspacer-nexus        | 5′-GGUAUCAACUUGAAAAAGUGGCACCGAGUCGGUGCUUUUUUU-3′                                                                                                 | 2D                                            |
| EMX1 sgRNA, full-length        | 5′-GGUACCUCCAUGACUAGGGGUUUUAGAGCUAUGCUGGAAACAGCAUAGCAAGUUU-<br>AAAAUAAGGCUAGUCCGUUAUCAACUUGAAAAAGUGGCACCGAGUCGGUGCUUUUUUU-3′                     | 3B                                            |

\*RNA guide sequences and complementary DNA target strand sequences are shown in red; PAM sites are highlighted in yellow.
